# Supplementary material for: Inclusion Complexes of Lycopene and β-Cyclodextrin: Preparation, Characterization, Stability and Antioxidant Activity
Source: MDPI journal article supplement (doi:10.3390/antiox8080314), 2019-08-16
Supplement: s1 [file s1]

## Supplementary Materials

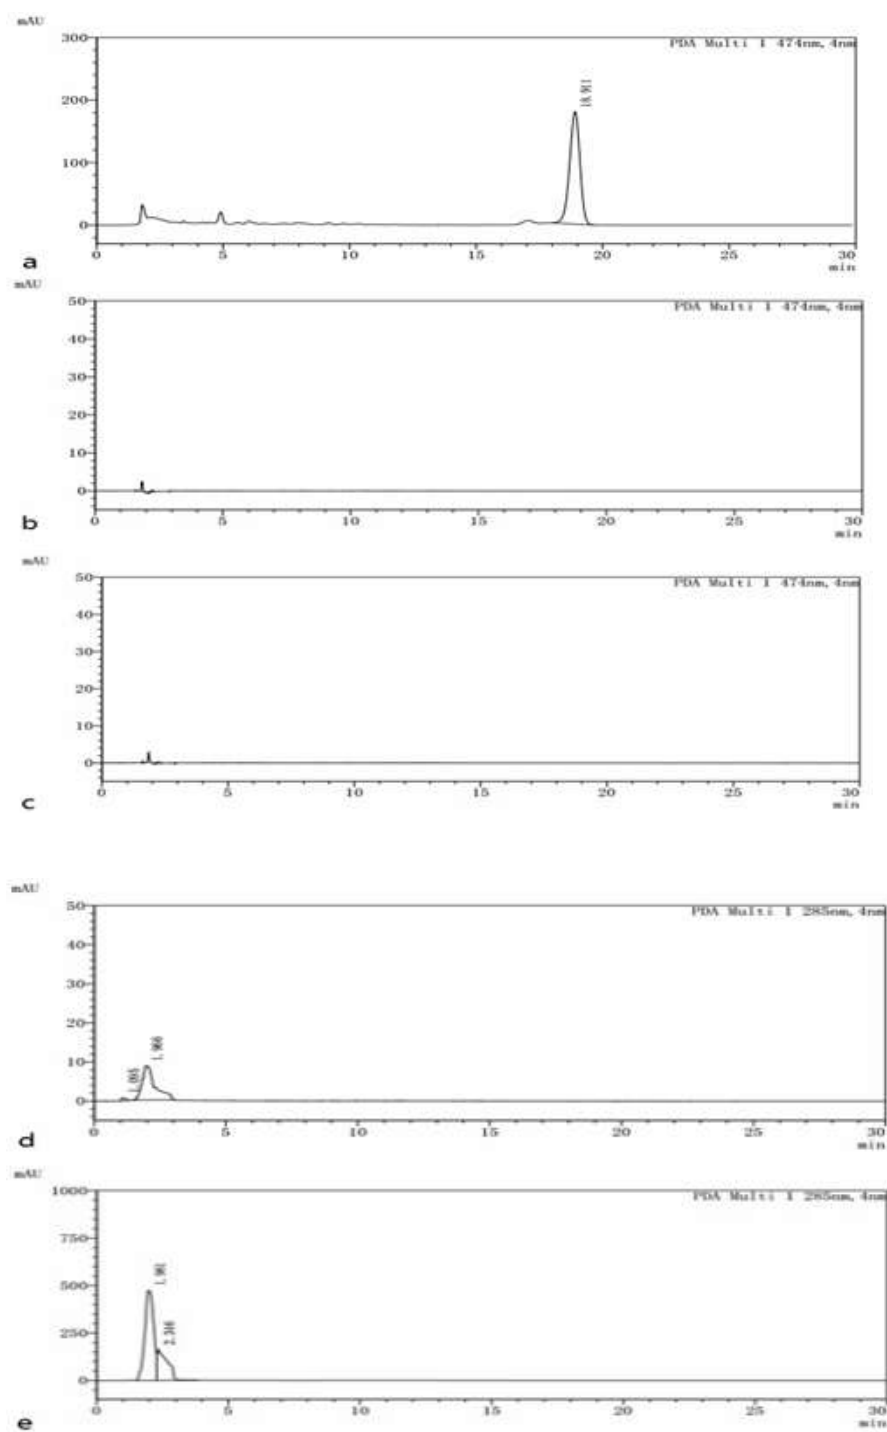

Fig. S1. HPLC of lycopene (a),  $\beta$ -CD (b) and inclusion complexes (c) (Detection wavelength: 474nm);  $\beta$ -CD (d) and inclusion complexes (e) (Detection wavelength: 285nm).

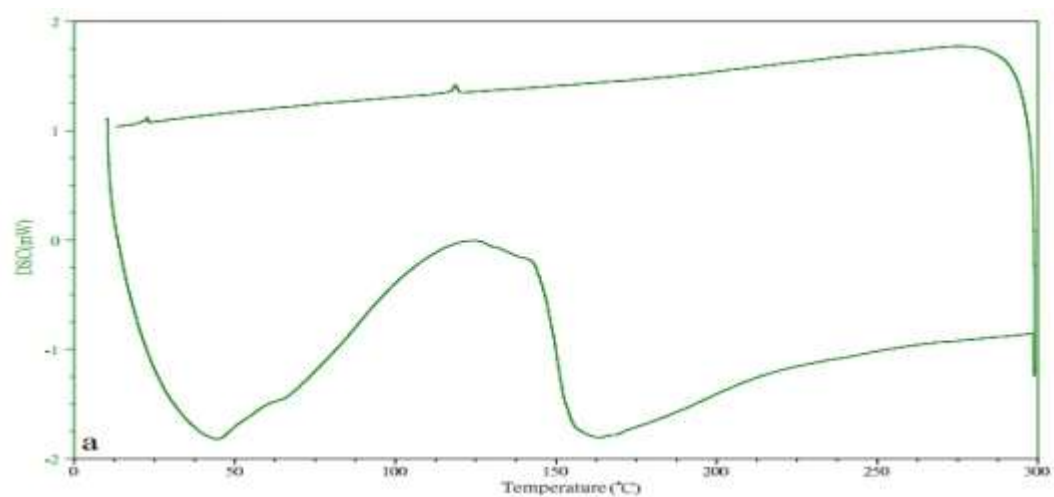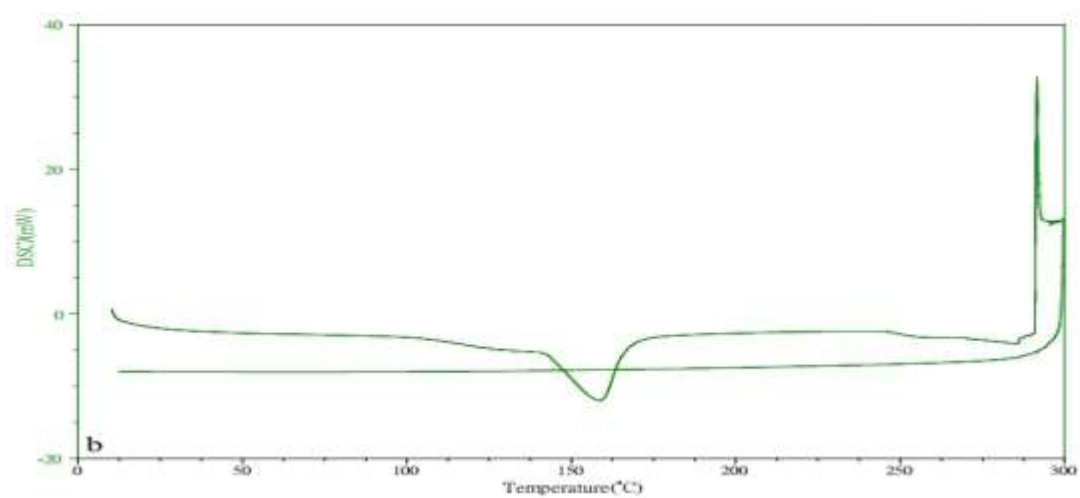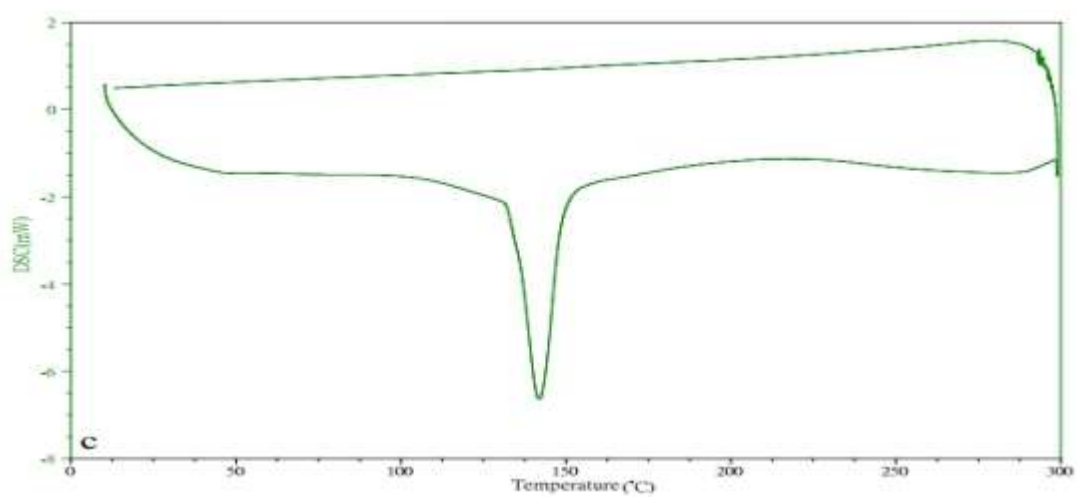

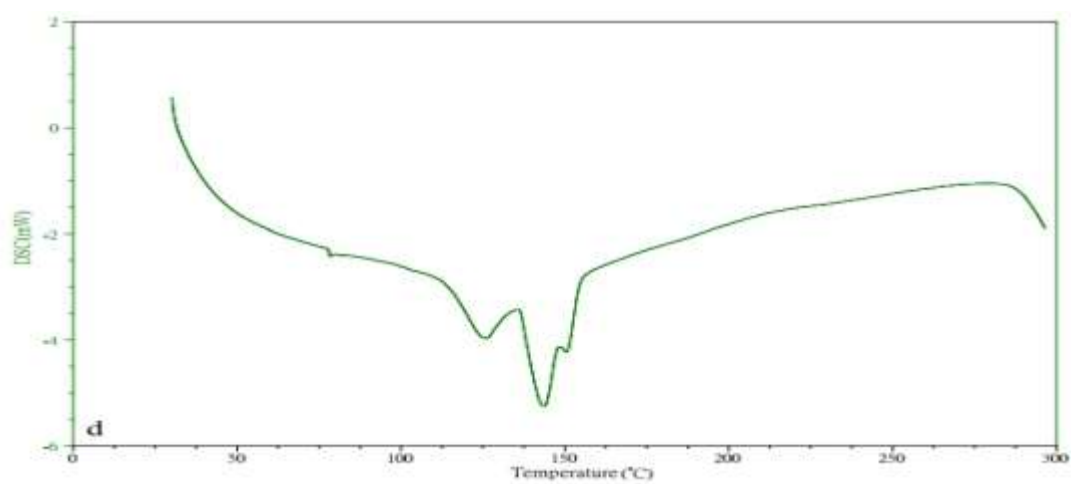

Fig. S2.DSC thermograms of lycopene (a),  $\beta$ -CD (b), their physical mixtures (c) and inclusion complexes (d).
